# Supplementary material for: Development and Analysis of a Stable, Reduced Complexity Model Soil Microbiome
Source: Front Microbiol. 2020 Aug 26;11:1987. doi: 10.3389/fmicb.2020.01987 (PMC7479069; doi:10.3389/fmicb.2020.01987)
Supplement: Supplementary file 1 [file Table_1.XLSX]

## Sheet: Sheet1
Consortia and Storage Method	Domain	Phylum	Class	Order	Family	Genus	Species	Original	Reconstituted Stock A	Reconstituted Stock B	Reconstituted Stock C	Reconstituted Stock D	Reconstituted Stock E	ReconstitutedAverageCounts	Ratio (AvgReconstituted/Original)
Full_C_2_Glycerol	Bacteria	Deinococcus-Thermus	Deinococci	Deinococcales	Deinococcaceae	Deinococcus	?	28	0	0	0	0		0	0
Full_C_2_Glycerol	Bacteria	Proteobacteria	Alphaproteobacteria	Sphingomonadales	?	?	?	56	1	0	0	1		0.5	0.00892857
Full_C_2_Glycerol	Bacteria	Armatimonadetes	Fimbriimonadia	Fimbriimonadales	Fimbriimonadaceae	?	?	19	1	0	2	2		1.25	0.0657895
Full_C_2_Glycerol	Bacteria	Proteobacteria	Alphaproteobacteria	Caulobacterales	Caulobacteraceae	Brevundimonas	?	12	3	2	1	0		1.5	0.125
Full_C_2_Glycerol	Bacteria	Bacteroidetes	Flavobacteriia	Flavobacteriales	Flavobacteriaceae	Flavobacterium	?	1337	299	299	212	271		270.25	0.202132
Full_C_2_Glycerol	Bacteria	Proteobacteria	Alphaproteobacteria	Rhodospirillales	Rhodospirillaceae	Inquilinus	?	17	4	3	3	7		4.25	0.25
Full_C_2_Glycerol	Bacteria	Bacteroidetes	Chitinophagia	Chitinophagales	Chitinophagaceae	?	?	69	15	13	34	20		20.5	0.297101
Full_C_2_Glycerol	Bacteria	Actinobacteria	Actinobacteria_(class)	Streptomycetales	Streptomycetaceae	Streptomyces	?	171	131	22	27	38		54.5	0.318713
Full_C_2_Glycerol	Bacteria	Proteobacteria	Alphaproteobacteria	Rhizobiales	Bradyrhizobiaceae	Bosea	?	9	6	4	2	1		3.25	0.361111
Full_C_2_Glycerol	Bacteria	Proteobacteria	Gammaproteobacteria	HTA4	?	?	?	138	160	7	28	25		55	0.398551
Full_C_2_Glycerol	Bacteria	Proteobacteria	Alphaproteobacteria	Rhizobiales	Rhizobiaceae	Ensifer	?	52	23	14	22	26		21.25	0.408654
Full_C_2_Glycerol	Bacteria	Proteobacteria	Gammaproteobacteria	?	?	?	?	92	148	6	4	5		40.75	0.442935
Full_C_2_Glycerol	Bacteria	Proteobacteria	Alphaproteobacteria	Rhizobiales	Hyphomicrobiaceae	Devosia	?	10	8	3	1	8		5	0.5
Full_C_2_Glycerol	Bacteria	Chlamydiae	Chlamydiia	Chlamydiales	?	?	?	33	55	9	2	7		18.25	0.55303
Full_C_2_Glycerol	Bacteria	Proteobacteria	Betaproteobacteria	Burkholderiales	Comamonadaceae	Variovorax	?	2284	1048	1240	1289	1623		1300	0.569177
Full_C_2_Glycerol	?	?	?	?	?	?	?	35	91	4	6	8		27.25	0.778571
Full_C_2_Glycerol	Bacteria	Proteobacteria	Alphaproteobacteria	Rhizobiales	?	?	?	7	9	6	9	5		7.25	1.03571
Full_C_2_Glycerol	Bacteria	Proteobacteria	Alphaproteobacteria	Caulobacterales	Caulobacteraceae	Caulobacter	?	28	19	32	42	37		32.5	1.16071
Full_C_2_Glycerol	Bacteria	Proteobacteria	Betaproteobacteria	Burkholderiales	Alcaligenaceae	Bordetella	?	5	6	6	4	11		6.75	1.35
Full_C_2_Glycerol	Bacteria	Proteobacteria	Alphaproteobacteria	Sphingomonadales	Sphingomonadaceae	Sphingomonas	?	21	24	28	31	47		32.5	1.54762
Full_C_2_Glycerol	Bacteria	Bacteroidetes	Cytophagia	Cytophagales	Cytophagaceae	Dyadobacter	?	471	723	866	1041	964		898.5	1.90764
Full_C_2_Glycerol	Bacteria	Proteobacteria	Alphaproteobacteria	Sphingomonadales	Sphingomonadaceae	Sphingopyxis	?	25	38	66	80	122		76.5	3.06
Full_C_2_Glycerol	Bacteria	Proteobacteria	Alphaproteobacteria	Rhizobiales	Rhizobiaceae	Ensifer	?	3	23	22	5	5		13.75	4.58333
Full_C_2_Glycerol	Bacteria	Proteobacteria	Alphaproteobacteria	Rhizobiales	Rhizobiaceae	Rhizobium	?	3	8	9	13	29		14.75	4.91667
Full_C_2_Glycerol	Bacteria	Proteobacteria	Alphaproteobacteria	Rhodospirillales	Acetobacteraceae	Roseomonas	?	13	61	53	68	77		64.75	4.98077
Full_C_2_Glycerol	Bacteria	Bacteroidetes	Chitinophagia	Chitinophagales	Chitinophagaceae	Taibaiella	?	17	115	84	90	91		95	5.58824
Full_C_2_Glycerol	Bacteria	Proteobacteria	Alphaproteobacteria	Rhizobiales	Rhizobiaceae	Rhizobium	?	2	17	5	15	8		11.25	5.625
Full_C_2_Glycerol	Bacteria	Proteobacteria	Gammaproteobacteria	Pseudomonadales	Pseudomonadaceae	Pseudomonas	?	271	2217	2440	2222	1810		2172.25	8.01568
Full_C_2_Lyophilization	Bacteria	Deinococcus-Thermus	Deinococci	Deinococcales	Deinococcaceae	Deinococcus	?	28	0	0	0	0		0	0
Full_C_2_Lyophilization	Bacteria	Armatimonadetes	Fimbriimonadia	Fimbriimonadales	Fimbriimonadaceae	?	?	19	1	0	0	0		0.25	0.0131579
Full_C_2_Lyophilization	Bacteria	Bacteroidetes	Chitinophagia	Chitinophagales	Chitinophagaceae	?	?	69	1	0	3	0		1	0.0144928
Full_C_2_Lyophilization	Bacteria	Bacteroidetes	Chitinophagia	Chitinophagales	Chitinophagaceae	Taibaiella	?	17	0	0	0	2		0.5	0.0294118
Full_C_2_Lyophilization	Bacteria	Proteobacteria	Alphaproteobacteria	Rhodospirillales	Rhodospirillaceae	Inquilinus	?	17	2	0	0	1		0.75	0.0441176
Full_C_2_Lyophilization	Bacteria	Actinobacteria	Actinobacteria_(class)	Streptomycetales	Streptomycetaceae	Streptomyces	?	171	12	8	6	5		7.75	0.0453216
Full_C_2_Lyophilization	Bacteria	Chlamydiae	Chlamydiia	Chlamydiales	?	?	?	33	3	0	0	9		3	0.0909091
Full_C_2_Lyophilization	Bacteria	Proteobacteria	Alphaproteobacteria	Rhizobiales	?	?	?	7	1	1	2	0		1	0.142857
Full_C_2_Lyophilization	Bacteria	Proteobacteria	Alphaproteobacteria	Sphingomonadales	?	?	?	56	18	11	5	8		10.5	0.1875
Full_C_2_Lyophilization	Bacteria	Bacteroidetes	Flavobacteriia	Flavobacteriales	Flavobacteriaceae	Flavobacterium	?	1337	315	276	229	249		267.25	0.199888
Full_C_2_Lyophilization	Bacteria	Proteobacteria	Gammaproteobacteria	HTA4	?	?	?	138	50	5	0	76		32.75	0.237319
Full_C_2_Lyophilization	Bacteria	Proteobacteria	Gammaproteobacteria	?	?	?	?	92	36	10	0	52		24.5	0.266304
Full_C_2_Lyophilization	?	?	?	?	?	?	?	35	10	6	0	27		10.75	0.307143
Full_C_2_Lyophilization	Bacteria	Proteobacteria	Alphaproteobacteria	Caulobacterales	Caulobacteraceae	Brevundimonas	?	12	0	3	5	7		3.75	0.3125
Full_C_2_Lyophilization	Bacteria	Bacteroidetes	Cytophagia	Cytophagales	Cytophagaceae	Dyadobacter	?	471	152	181	131	186		162.5	0.345011
Full_C_2_Lyophilization	Bacteria	Proteobacteria	Gammaproteobacteria	Pseudomonadales	Pseudomonadaceae	Pseudomonas	?	271	78	0	497	98		168.25	0.620849
Full_C_2_Lyophilization	Bacteria	Proteobacteria	Alphaproteobacteria	Rhizobiales	Bradyrhizobiaceae	Bosea	?	9	9	12	3	5		7.25	0.805556
Full_C_2_Lyophilization	Bacteria	Proteobacteria	Alphaproteobacteria	Caulobacterales	Caulobacteraceae	Caulobacter	?	28	25	34	30	26		28.75	1.02679
Full_C_2_Lyophilization	Bacteria	Proteobacteria	Alphaproteobacteria	Rhizobiales	Hyphomicrobiaceae	Devosia	?	10	15	18	18	6		14.25	1.425
Full_C_2_Lyophilization	Bacteria	Proteobacteria	Betaproteobacteria	Burkholderiales	Comamonadaceae	Variovorax	?	2284	4134	4331	3922	4280		4166.75	1.82432
Full_C_2_Lyophilization	Bacteria	Proteobacteria	Alphaproteobacteria	Rhodospirillales	Acetobacteraceae	Roseomonas	?	13	28	36	4	30		24.5	1.88462
Full_C_2_Lyophilization	Bacteria	Proteobacteria	Alphaproteobacteria	Sphingomonadales	Sphingomonadaceae	Sphingomonas	?	21	37	21	56	46		40	1.90476
Full_C_2_Lyophilization	Bacteria	Proteobacteria	Alphaproteobacteria	Rhizobiales	Rhizobiaceae	Ensifer	?	52	129	104	191	62		121.5	2.33654
Full_C_2_Lyophilization	Bacteria	Proteobacteria	Alphaproteobacteria	Sphingomonadales	Sphingomonadaceae	Sphingopyxis	?	25	137	134	74	52		99.25	3.97
Full_C_2_Lyophilization	Bacteria	Proteobacteria	Alphaproteobacteria	Rhizobiales	Rhizobiaceae	Rhizobium	?	2	12	11	24	4		12.75	6.375
Full_C_2_Lyophilization	Bacteria	Proteobacteria	Betaproteobacteria	Burkholderiales	Alcaligenaceae	Bordetella	?	5	33	47	43	14		34.25	6.85
Full_D_3_Glycerol	Bacteria	Verrucomicrobia	Verrucomicrobiae	Verrucomicrobiales	Verrucomicrobiaceae	Haloferula	?	30	0	0	1	0		0.25	0.00833333
Full_D_3_Glycerol	Bacteria	Bacteroidetes	Chitinophagia	Chitinophagales	Chitinophagaceae	Flavitalea	?	15	3	0	1	0		1	0.0666667
Full_D_3_Glycerol	Bacteria	Deinococcus-Thermus	Deinococci	Deinococcales	Deinococcaceae	Deinococcus	?	46	14	0	4	0		4.5	0.0978261
Full_D_3_Glycerol	Bacteria	Proteobacteria	Alphaproteobacteria	Rickettsiales	Rickettsiales_Incertae_Sedis	Candidatus_Odyssella	?	288	83	15	20	14		33	0.114583
Full_D_3_Glycerol	Bacteria	Armatimonadetes	Fimbriimonadia	Fimbriimonadales	Fimbriimonadaceae	?	?	196	7	27	9	51		23.5	0.119898
Full_D_3_Glycerol	Bacteria	Proteobacteria	Betaproteobacteria	Burkholderiales	Alcaligenaceae	Bordetella	?	8	2	0	2	0		1	0.125
Full_D_3_Glycerol	Bacteria	Proteobacteria	Betaproteobacteria	Burkholderiales	Oxalobacteraceae	Massilia	?	42	9	1	0	12		5.5	0.130952
Full_D_3_Glycerol	Bacteria	Proteobacteria	Gammaproteobacteria	Xanthomonadales	Xanthomonadales_Incertae_Sedis	?	?	30	7	4	7	6		6	0.2
Full_D_3_Glycerol	Bacteria	Proteobacteria	Alphaproteobacteria	Rhodospirillales	Rhodospirillaceae	Inquilinus	?	24	3	4	6	10		5.75	0.239583
Full_D_3_Glycerol	Bacteria	Proteobacteria	Alphaproteobacteria	Rhodospirillales	Rhodospirillales_Incertae_Sedis	Reyranella	?	5	1	1	3	0		1.25	0.25
Full_D_3_Glycerol	Bacteria	Bacteroidetes	Chitinophagia	Chitinophagales	Chitinophagaceae	Chitinophaga	?	73	72	0	10	0		20.5	0.280822
Full_D_3_Glycerol	Bacteria	Proteobacteria	Betaproteobacteria	Burkholderiales	?	?	?	58	28	5	18	56		26.75	0.461207
Full_D_3_Glycerol	Bacteria	Proteobacteria	Alphaproteobacteria	Caulobacterales	Caulobacteraceae	Phenylobacterium	?	7	3	1	2	8		3.5	0.5
Full_D_3_Glycerol	Bacteria	Actinobacteria	Actinobacteria_(class)	Micrococcales	Micrococcaceae	?	?	884	585	529	415	622		537.75	0.608314
Full_D_3_Glycerol	Bacteria	Proteobacteria	Alphaproteobacteria	Rhizobiales	Rhizobiaceae	Rhizobium	?	320	196	204	334	141		218.75	0.683594
Full_D_3_Glycerol	Bacteria	Proteobacteria	Betaproteobacteria	Burkholderiales	Comamonadaceae	Variovorax	?	1032	984	751	878	634		811.75	0.786579
Full_D_3_Glycerol	Bacteria	Proteobacteria	Alphaproteobacteria	Rhizobiales	?	?	?	7	11	5	5	3		6	0.857143
Full_D_3_Glycerol	Bacteria	Proteobacteria	Betaproteobacteria	Burkholderiales	Burkholderiaceae	Cupriavidus	?	3	3	0	1	7		2.75	0.916667
Full_D_3_Glycerol	Bacteria	Proteobacteria	Alphaproteobacteria	Caulobacterales	Caulobacteraceae	Caulobacter	?	387	361	286	79	775		375.25	0.969638
Full_D_3_Glycerol	Bacteria	Bacteroidetes	Flavobacteriia	Flavobacteriales	Flavobacteriaceae	Flavobacterium	?	629	438	885	478	682		620.75	0.986884
Full_D_3_Glycerol	Bacteria	Proteobacteria	Alphaproteobacteria	Rhizobiales	Rhizobiaceae	Rhizobium	?	6	5	4	9	6		6	1
Full_D_3_Glycerol	Bacteria	Bacteroidetes	Sphingobacteriia	Sphingobacteriales	Sphingobacteriaceae	Pedobacter	?	213	221	194	345	130		222.5	1.0446
Full_D_3_Glycerol	Bacteria	Proteobacteria	Alphaproteobacteria	Rhodospirillales	Acetobacteraceae	?	?	6	9	10	6	10		8.75	1.45833
Full_D_3_Glycerol	Bacteria	Bacteroidetes	Cytophagia	Cytophagales	Cytophagaceae	Dyadobacter	?	261	133	790	145	496		391	1.49808
Full_D_3_Glycerol	Bacteria	Proteobacteria	Alphaproteobacteria	Sphingomonadales	Sphingomonadaceae	Sphingomonas	?	5	10	1	14	7		8	1.6
Full_D_3_Glycerol	Bacteria	Proteobacteria	Alphaproteobacteria	Rhizobiales	Bradyrhizobiaceae	Bosea	?	10	23	4	20	18		16.25	1.625
Full_D_3_Glycerol	Bacteria	Proteobacteria	Alphaproteobacteria	Sphingomonadales	Sphingomonadaceae	Sphingopyxis	?	66	132	69	86	155		110.5	1.67424
Full_D_3_Glycerol	Bacteria	Proteobacteria	Alphaproteobacteria	Caulobacterales	Caulobacteraceae	Brevundimonas	?	39	65	51	42	106		66	1.69231
Full_D_3_Glycerol	Bacteria	Proteobacteria	Alphaproteobacteria	Rhizobiales	Rhizobiaceae	Ensifer	?	8	19	6	35	6		16.5	2.0625
Full_D_3_Glycerol	Bacteria	Proteobacteria	Alphaproteobacteria	Rhizobiales	Hyphomicrobiaceae	Devosia	?	1	2	0	7	0		2.25	2.25
Full_D_3_Glycerol	Bacteria	Proteobacteria	Alphaproteobacteria	Rhizobiales	Rhizobiaceae	Rhizobium	?	2	5	7	7	0		4.75	2.375
Full_D_3_Glycerol	Bacteria	Proteobacteria	Gammaproteobacteria	Pseudomonadales	Pseudomonadaceae	Pseudomonas	?	458	1316	1100	1250	1010		1169	2.5524
Full_D_3_Glycerol	?	?	?	?	?	?	?	59	286	80	561	55		245.5	4.16102
Full_D_3_Glycerol	Bacteria	Proteobacteria	Alphaproteobacteria	Rhizobiales	?	?	?	1	5	7	11	8		7.75	7.75
Full_D_3_Glycerol	Bacteria	Proteobacteria	Alphaproteobacteria	Rhizobiales	Rhizobiaceae	Ensifer	?	5	86	71	218	78		113.25	22.65
Full_D_3_Glycerol	Bacteria	Proteobacteria	Alphaproteobacteria	Rhizobiales	Hyphomicrobiaceae	Devosia	?	4	97	134	191	128		137.5	34.375
Full_D_3_Lyophilization	Bacteria	Bacteroidetes	Chitinophagia	Chitinophagales	Chitinophagaceae	Flavitalea	?	15	0	0	0	0		0	0
Full_D_3_Lyophilization	Bacteria	Proteobacteria	Gammaproteobacteria	Xanthomonadales	Xanthomonadales_Incertae_Sedis	?	?	30	0	0	0	0		0	0
Full_D_3_Lyophilization	Bacteria	Proteobacteria	Alphaproteobacteria	Rickettsiales	Rickettsiales_Incertae_Sedis	Candidatus_Odyssella	?	288	0	0	0	0		0	0
Full_D_3_Lyophilization	Bacteria	Proteobacteria	Gammaproteobacteria	Pseudomonadales	Pseudomonadaceae	Pseudomonas	?	458	0	2	1	0		0.75	0.00163755
Full_D_3_Lyophilization	Bacteria	Proteobacteria	Betaproteobacteria	Burkholderiales	Oxalobacteraceae	Massilia	?	42	1	0	0	0		0.25	0.00595238
Full_D_3_Lyophilization	Bacteria	Proteobacteria	Alphaproteobacteria	Caulobacterales	Caulobacteraceae	Caulobacter	?	387	13	22	5	8		12	0.0310078
Full_D_3_Lyophilization	Bacteria	Armatimonadetes	Fimbriimonadia	Fimbriimonadales	Fimbriimonadaceae	?	?	196	43	17	4	4		17	0.0867347
Full_D_3_Lyophilization	Bacteria	Verrucomicrobia	Verrucomicrobiae	Verrucomicrobiales	Verrucomicrobiaceae	Haloferula	?	30	4	7	0	0		2.75	0.0916667
Full_D_3_Lyophilization	Bacteria	Proteobacteria	Alphaproteobacteria	Rhodospirillales	Rhodospirillaceae	Inquilinus	?	24	9	3	4	2		4.5	0.1875
Full_D_3_Lyophilization	Bacteria	Actinobacteria	Actinobacteria_(class)	Micrococcales	Micrococcaceae	?	?	884	199	266	160	354		244.75	0.276867
Full_D_3_Lyophilization	Bacteria	Bacteroidetes	Chitinophagia	Chitinophagales	Chitinophagaceae	Chitinophaga	?	73	43	50	46	12		37.75	0.517123
Full_D_3_Lyophilization	Bacteria	Proteobacteria	Alphaproteobacteria	Sphingomonadales	Sphingomonadaceae	Sphingopyxis	?	66	34	52	39	14		34.75	0.526515
Full_D_3_Lyophilization	Bacteria	Bacteroidetes	Flavobacteriia	Flavobacteriales	Flavobacteriaceae	Flavobacterium	?	629	384	529	272	420		401.25	0.637917
Full_D_3_Lyophilization	Bacteria	Proteobacteria	Alphaproteobacteria	Rhizobiales	?	?	?	7	3	9	3	4		4.75	0.678571
Full_D_3_Lyophilization	Bacteria	Proteobacteria	Alphaproteobacteria	Rhodospirillales	Acetobacteraceae	?	?	6	9	6	1	2		4.5	0.75
Full_D_3_Lyophilization	Bacteria	Proteobacteria	Alphaproteobacteria	Rhizobiales	Rhizobiaceae	Rhizobium	?	320	269	296	278	131		243.5	0.760938
Full_D_3_Lyophilization	Bacteria	Bacteroidetes	Cytophagia	Cytophagales	Cytophagaceae	Dyadobacter	?	261	201	387	92	192		218	0.835249
Full_D_3_Lyophilization	Bacteria	Proteobacteria	Alphaproteobacteria	Sphingomonadales	Sphingomonadaceae	Sphingomonas	?	5	6	3	5	3		4.25	0.85
Full_D_3_Lyophilization	Bacteria	Bacteroidetes	Sphingobacteriia	Sphingobacteriales	Sphingobacteriaceae	Pedobacter	?	213	204	230	258	78		192.5	0.903756
Full_D_3_Lyophilization	Bacteria	Proteobacteria	Alphaproteobacteria	Rhizobiales	Phyllobacteriaceae	?	?	3	3	4	3	1		2.75	0.916667
Full_D_3_Lyophilization	Bacteria	Proteobacteria	Betaproteobacteria	Burkholderiales	Alcaligenaceae	Bordetella	?	8	8	27	2	1		9.5	1.1875
Full_D_3_Lyophilization	Bacteria	Proteobacteria	Alphaproteobacteria	Rhizobiales	Rhizobiaceae	Rhizobium	?	6	12	8	7	6		8.25	1.375
Full_D_3_Lyophilization	Bacteria	Proteobacteria	Betaproteobacteria	Burkholderiales	?	?	?	58	87	138	59	41		81.25	1.40086
Full_D_3_Lyophilization	Bacteria	Proteobacteria	Alphaproteobacteria	Rhizobiales	Rhizobiaceae	Rhizobium	?	2	8	2	6	0		4	2
Full_D_3_Lyophilization	Bacteria	Proteobacteria	Betaproteobacteria	Burkholderiales	Comamonadaceae	Variovorax	?	1032	2688	1894	2944	2643		2542.25	2.46342
Full_D_3_Lyophilization	Bacteria	Deinococcus-Thermus	Deinococci	Deinococcales	Deinococcaceae	Deinococcus	?	46	196	104	59	171		132.5	2.88043
Full_D_3_Lyophilization	Bacteria	Proteobacteria	Alphaproteobacteria	Caulobacterales	Caulobacteraceae	Brevundimonas	?	39	147	203	124	29		125.75	3.22436
Full_D_3_Lyophilization	Bacteria	Proteobacteria	Alphaproteobacteria	Rhizobiales	Rhizobiaceae	Ensifer	?	5	18	12	28	20		19.5	3.9
Full_D_3_Lyophilization	Bacteria	Proteobacteria	Alphaproteobacteria	Rhizobiales	Rhizobiaceae	Ensifer	?	8	33	52	28	27		35	4.375
Full_D_3_Lyophilization	Bacteria	Proteobacteria	Betaproteobacteria	Burkholderiales	Burkholderiaceae	Cupriavidus	?	3	11	28	11	10		15	5
Full_D_3_Lyophilization	Bacteria	Proteobacteria	Alphaproteobacteria	Rhizobiales	Bradyrhizobiaceae	Bosea	?	10	70	99	46	16		57.75	5.775
Full_D_3_Lyophilization	?	?	?	?	?	?	?	59	414	698	605	895		653	11.0678
Full_D_3_Lyophilization	Bacteria	Proteobacteria	Alphaproteobacteria	Rhizobiales	Hyphomicrobiaceae	Devosia	?	4	62	60	66	132		80	20
Full_D_4_Glycerol	Bacteria	Proteobacteria	Gammaproteobacteria	Cellvibrionales	Cellvibrionaceae	Cellvibrio	?	122	0	0	1	0		0.25	0.00204918
Full_D_4_Glycerol	Bacteria	Verrucomicrobia	Verrucomicrobiae	Verrucomicrobiales	Verrucomicrobiaceae	Haloferula	?	29	0	1	1	0		0.5	0.0172414
Full_D_4_Glycerol	Bacteria	Proteobacteria	Alphaproteobacteria	Sphingomonadales	?	?	?	10	1	0	4	0		1.25	0.125
Full_D_4_Glycerol	Bacteria	Proteobacteria	Alphaproteobacteria	Rhodospirillales	Rhodospirillaceae	Inquilinus	?	32	4	2	10	3		4.75	0.148438
Full_D_4_Glycerol	Bacteria	Proteobacteria	Alphaproteobacteria	Rickettsiales	Rickettsiales_Incertae_Sedis	Candidatus_Odyssella	?	400	142	29	66	37		68.5	0.17125
Full_D_4_Glycerol	Bacteria	Bacteroidetes	Cytophagia	Cytophagales	Flammeovirgaceae	Candidatus_Amoebophilus	?	7	3	1	1	0		1.25	0.178571
Full_D_4_Glycerol	Bacteria	Proteobacteria	Gammaproteobacteria	Xanthomonadales	Xanthomonadales_Incertae_Sedis	?	?	19	7	5	5	6		5.75	0.302632
Full_D_4_Glycerol	Bacteria	Proteobacteria	Betaproteobacteria	Burkholderiales	?	?	?	46	26	21	26	26		24.75	0.538043
Full_D_4_Glycerol	Bacteria	Proteobacteria	Betaproteobacteria	Burkholderiales	Burkholderiaceae	Cupriavidus	?	6	6	4	2	2		3.5	0.583333
Full_D_4_Glycerol	Bacteria	Proteobacteria	Betaproteobacteria	Burkholderiales	Comamonadaceae	Variovorax	?	760	678	355	412	339		446	0.586842
Full_D_4_Glycerol	Bacteria	Actinobacteria	Actinobacteria_(class)	Micrococcales	Micrococcaceae	?	?	691	326	424	607	307		416	0.602026
Full_D_4_Glycerol	Bacteria	Armatimonadetes	Fimbriimonadia	Fimbriimonadales	Fimbriimonadaceae	?	?	143	106	73	103	79		90.25	0.631119
Full_D_4_Glycerol	Bacteria	Proteobacteria	Alphaproteobacteria	Rhizobiales	Rhizobiaceae	Rhizobium	?	4	6	4	1	1		3	0.75
Full_D_4_Glycerol	Bacteria	Proteobacteria	Alphaproteobacteria	Rhizobiales	Rhizobiaceae	Rhizobium	?	66	59	47	59	34		49.75	0.753788
Full_D_4_Glycerol	Bacteria	Bacteroidetes	Sphingobacteriia	Sphingobacteriales	Sphingobacteriaceae	Pedobacter	?	103	123	86	59	61		82.25	0.798544
Full_D_4_Glycerol	Bacteria	Bacteroidetes	Flavobacteriia	Flavobacteriales	Flavobacteriaceae	Flavobacterium	?	476	550	367	343	336		399	0.838235
Full_D_4_Glycerol	Bacteria	Bacteroidetes	Cytophagia	Cytophagales	Cytophagaceae	Dyadobacter	?	380	359	300	410	226		323.75	0.851974
Full_D_4_Glycerol	Bacteria	Proteobacteria	Alphaproteobacteria	Sphingomonadales	Sphingomonadaceae	Sphingomonas	?	9	5	18	5	8		9	1
Full_D_4_Glycerol	Bacteria	Proteobacteria	Alphaproteobacteria	Caulobacterales	Caulobacteraceae	Phenylobacterium	?	7	17	6	6	11		10	1.42857
Full_D_4_Glycerol	Bacteria	Bacteroidetes	Flavobacteriia	Flavobacteriales	Flavobacteriaceae	Flavobacterium	?	33	63	57	65	17		50.5	1.5303
Full_D_4_Glycerol	Bacteria	Proteobacteria	Betaproteobacteria	Burkholderiales	Oxalobacteraceae	Massilia	?	160	196	326	165	300		246.75	1.54219
Full_D_4_Glycerol	Bacteria	Proteobacteria	Gammaproteobacteria	Pseudomonadales	Pseudomonadaceae	Pseudomonas	?	1479	2078	2434	2244	2740		2374	1.60514
Full_D_4_Glycerol	Bacteria	Proteobacteria	Alphaproteobacteria	Rhizobiales	?	?	?	6	7	11	12	9		9.75	1.625
Full_D_4_Glycerol	Bacteria	Proteobacteria	Alphaproteobacteria	Rhodospirillales	Acetobacteraceae	?	?	3	3	5	5	7		5	1.66667
Full_D_4_Glycerol	Bacteria	Proteobacteria	Alphaproteobacteria	Rhizobiales	Bradyrhizobiaceae	Bosea	?	16	31	25	24	27		26.75	1.67188
Full_D_4_Glycerol	Bacteria	Proteobacteria	Alphaproteobacteria	Rhizobiales	Rhizobiaceae	Ensifer	?	5	10	7	12	13		10.5	2.1
Full_D_4_Glycerol	Bacteria	Bacteroidetes	Chitinophagia	Chitinophagales	Chitinophagaceae	Taibaiella	?	3	10	4	8	4		6.5	2.16667
Full_D_4_Glycerol	Bacteria	Proteobacteria	Alphaproteobacteria	Sphingomonadales	Sphingomonadaceae	Sphingopyxis	?	89	181	250	189	223		210.75	2.36798
Full_D_4_Glycerol	Bacteria	Proteobacteria	Alphaproteobacteria	Caulobacterales	Caulobacteraceae	Caulobacter	?	63	88	161	182	228		164.75	2.61508
Full_D_4_Glycerol	Bacteria	Proteobacteria	Alphaproteobacteria	Caulobacterales	Caulobacteraceae	Brevundimonas	?	48	113	171	141	130		138.75	2.89062
Full_D_4_Glycerol	Bacteria	Proteobacteria	Alphaproteobacteria	Rhizobiales	Rhizobiaceae	?	?	1	2	4	2	10		4.5	4.5
Full_D_4_Glycerol	Bacteria	Proteobacteria	Alphaproteobacteria	Rhizobiales	Hyphomicrobiaceae	Devosia	?	5	37	38	65	46		46.5	9.3
Full_D_4_Lyophilization	Bacteria	Proteobacteria	Gammaproteobacteria	Xanthomonadales	Xanthomonadales_Incertae_Sedis	?	?	19	0	0	0	0		0	0
Full_D_4_Lyophilization	Bacteria	Bacteroidetes	Flavobacteriia	Flavobacteriales	Flavobacteriaceae	Flavobacterium	?	33	0	0	0	0		0	0
Full_D_4_Lyophilization	Bacteria	Proteobacteria	Gammaproteobacteria	Cellvibrionales	Cellvibrionaceae	Cellvibrio	?	122	0	0	0	0		0	0
Full_D_4_Lyophilization	Bacteria	Proteobacteria	Alphaproteobacteria	Rickettsiales	Rickettsiales_Incertae_Sedis	Candidatus_Odyssella	?	400	4	2	0	1		1.75	0.004375
Full_D_4_Lyophilization	Bacteria	Proteobacteria	Betaproteobacteria	Burkholderiales	Oxalobacteraceae	Massilia	?	160	0	1	1	1		0.75	0.0046875
Full_D_4_Lyophilization	Bacteria	Proteobacteria	Gammaproteobacteria	Pseudomonadales	Pseudomonadaceae	Pseudomonas	?	1479	92	5	22	8		31.75	0.0214672
Full_D_4_Lyophilization	Bacteria	Verrucomicrobia	Verrucomicrobiae	Verrucomicrobiales	Verrucomicrobiaceae	Haloferula	?	29	0	5	0	0		1.25	0.0431034
Full_D_4_Lyophilization	Bacteria	Proteobacteria	Alphaproteobacteria	Sphingomonadales	?	?	?	10	1	0	1	0		0.5	0.05
Full_D_4_Lyophilization	Bacteria	Proteobacteria	Alphaproteobacteria	Rhodospirillales	Rhodospirillaceae	Inquilinus	?	32	5	0	0	2		1.75	0.0546875
Full_D_4_Lyophilization	Bacteria	Bacteroidetes	Chitinophagia	Chitinophagales	Chitinophagaceae	Flavitalea	?	8	1	2	0	0		0.75	0.09375
Full_D_4_Lyophilization	Bacteria	Armatimonadetes	Fimbriimonadia	Fimbriimonadales	Fimbriimonadaceae	?	?	143	34	8	3	15		15	0.104895
Full_D_4_Lyophilization	Bacteria	Proteobacteria	Alphaproteobacteria	Rhizobiales	?	?	?	6	2	0	0	3		1.25	0.208333
Full_D_4_Lyophilization	Bacteria	Proteobacteria	Alphaproteobacteria	Caulobacterales	Caulobacteraceae	Phenylobacterium	?	7	4	0	1	1		1.5	0.214286
Full_D_4_Lyophilization	Bacteria	Bacteroidetes	Flavobacteriia	Flavobacteriales	Flavobacteriaceae	Flavobacterium	?	476	287	314	132	74		201.75	0.423845
Full_D_4_Lyophilization	Bacteria	Actinobacteria	Actinobacteria_(class)	Micrococcales	Micrococcaceae	?	?	691	267	300	307	479		338.25	0.489508
Full_D_4_Lyophilization	Bacteria	Proteobacteria	Alphaproteobacteria	Caulobacterales	Caulobacteraceae	Caulobacter	?	63	28	31	34	43		34	0.539683
Full_D_4_Lyophilization	Bacteria	Actinobacteria	Actinobacteria_(class)	Corynebacteriales	Nocardiaceae	Rhodococcus	?	4	1	2	4	4		2.75	0.6875
Full_D_4_Lyophilization	Bacteria	Bacteroidetes	Cytophagia	Cytophagales	Cytophagaceae	Dyadobacter	?	380	378	378	322	627		426.25	1.12171
Full_D_4_Lyophilization	Bacteria	Proteobacteria	Alphaproteobacteria	Sphingomonadales	Sphingomonadaceae	Sphingomonas	?	9	9	13	16	3		10.25	1.13889
Full_D_4_Lyophilization	Bacteria	Proteobacteria	Alphaproteobacteria	Rhodospirillales	Acetobacteraceae	?	?	3	0	5	4	5		3.5	1.16667
Full_D_4_Lyophilization	Bacteria	Bacteroidetes	Chitinophagia	Chitinophagales	Chitinophagaceae	Taibaiella	?	3	0	1	5	9		3.75	1.25
Full_D_4_Lyophilization	Bacteria	Proteobacteria	Alphaproteobacteria	Sphingomonadales	Sphingomonadaceae	Sphingopyxis	?	89	148	90	121	230		147.25	1.65449
Full_D_4_Lyophilization	Bacteria	Proteobacteria	Alphaproteobacteria	Rhizobiales	Rhizobiaceae	?	?	1	5	1	1	2		2.25	2.25
Full_D_4_Lyophilization	Bacteria	Proteobacteria	Betaproteobacteria	Burkholderiales	Comamonadaceae	Variovorax	?	760	1881	1743	1774	1651		1762.25	2.31875
Full_D_4_Lyophilization	Bacteria	Proteobacteria	Alphaproteobacteria	Rhizobiales	Phyllobacteriaceae	Phyllobacterium	?	2	7	5	7	5		6	3
Full_D_4_Lyophilization	Bacteria	Bacteroidetes	Sphingobacteriia	Sphingobacteriales	Sphingobacteriaceae	Pedobacter	?	103	256	346	364	553		379.75	3.68689
Full_D_4_Lyophilization	Bacteria	Proteobacteria	Alphaproteobacteria	Rhizobiales	Rhizobiaceae	Rhizobium	?	4	15	20	18	16		17.25	4.3125
Full_D_4_Lyophilization	Bacteria	Proteobacteria	Alphaproteobacteria	Rhizobiales	Rhizobiaceae	Rhizobium	?	66	322	286	281	357		311.5	4.7197
Full_D_4_Lyophilization	Bacteria	Proteobacteria	Alphaproteobacteria	Rhizobiales	Hyphomicrobiaceae	Devosia	?	5	12	26	54	44		34	6.8
Full_D_4_Lyophilization	Bacteria	Proteobacteria	Betaproteobacteria	Burkholderiales	?	?	?	46	332	558	570	200		415	9.02174
Full_D_4_Lyophilization	Bacteria	Proteobacteria	Betaproteobacteria	Burkholderiales	Burkholderiaceae	Cupriavidus	?	6	55	94	92	45		71.5	11.9167
Full_D_4_Lyophilization	Bacteria	Proteobacteria	Alphaproteobacteria	Rhizobiales	Bradyrhizobiaceae	Bosea	?	16	222	163	233	266		221	13.8125
Full_D_4_Lyophilization	Bacteria	Proteobacteria	Alphaproteobacteria	Caulobacterales	Caulobacteraceae	Brevundimonas	?	48	745	747	766	420		669.5	13.9479
Full_D_4_Lyophilization	Bacteria	Proteobacteria	Alphaproteobacteria	Rhizobiales	Rhizobiaceae	Ensifer	?	5	89	74	76	93		83	16.6
Sect_A_3_Glycerol	Bacteria	Bacteroidetes	Flavobacteriia	Flavobacteriales	Crocinitomicaceae	Fluviicola	?	335	0	0	0	0	0	0	0
Sect_A_3_Glycerol	Bacteria	Armatimonadetes	Fimbriimonadia	Fimbriimonadales	Fimbriimonadaceae	?	?	105	1	1	0	1	3	1.2	0.0114286
Sect_A_3_Glycerol	Bacteria	Proteobacteria	Alphaproteobacteria	Rhizobiales	Hyphomicrobiaceae	?	?	659	63	56	99	80	152	90	0.136571
Sect_A_3_Glycerol	Bacteria	Proteobacteria	Alphaproteobacteria	Rhodospirillales	Rhodospirillaceae	Inquilinus	?	153	36	41	32	50	6	33	0.215686
Sect_A_3_Glycerol	Bacteria	Proteobacteria	Betaproteobacteria	Burkholderiales	Comamonadaceae	Variovorax	?	1360	380	503	287	328	75	314.6	0.231324
Sect_A_3_Glycerol	Bacteria	Proteobacteria	Alphaproteobacteria	Rhizobiales	Xanthobacteraceae	?	?	6	1	2	5	0	2	2	0.333333
Sect_A_3_Glycerol	Bacteria	Deinococcus-Thermus	Deinococci	Deinococcales	Deinococcaceae	Deinococcus	?	256	94	160	90	112	15	94.2	0.367969
Sect_A_3_Glycerol	Bacteria	Bacteroidetes	Flavobacteriia	Flavobacteriales	Flavobacteriaceae	Flavobacterium	?	537	183	231	125	325	131	199	0.370577
Sect_A_3_Glycerol	Bacteria	Bacteroidetes	Cytophagia	Cytophagales	Cytophagaceae	Dyadobacter	?	1022	291	503	476	518	371	431.8	0.422505
Sect_A_3_Glycerol	Bacteria	Proteobacteria	Alphaproteobacteria	Rhodospirillales	Acetobacteraceae	Roseomonas	?	11	2	3	6	3	11	5	0.454545
Sect_A_3_Glycerol	Bacteria	Proteobacteria	Gammaproteobacteria	Pseudomonadales	Pseudomonadaceae	Pseudomonas	?	3	3	2	2	3	1	2.2	0.733333
Sect_A_3_Glycerol	Bacteria	Bacteroidetes	Chitinophagia	Chitinophagales	Chitinophagaceae	Taibaiella	?	13	10	26	17	33	5	18.2	1.4
Sect_A_3_Glycerol	Bacteria	Proteobacteria	Alphaproteobacteria	Rhizobiales	Bradyrhizobiaceae	Bosea	?	113	136	156	195	160	213	172	1.52212
Sect_A_3_Glycerol	Bacteria	Proteobacteria	Alphaproteobacteria	Rhizobiales	Hyphomicrobiaceae	Devosia	?	9	12	9	11	9	41	16.4	1.82222
Sect_A_3_Glycerol	Bacteria	Proteobacteria	Alphaproteobacteria	Caulobacterales	Caulobacteraceae	Caulobacter	?	57	113	317	303	370	196	259.8	4.55789
Sect_A_3_Glycerol	Bacteria	Bacteroidetes	Chitinophagia	Chitinophagales	Chitinophagaceae	Niastella	?	319	1451	1283	1911	1415	1642	1540.4	4.82884
Sect_A_3_Glycerol	Bacteria	Proteobacteria	Alphaproteobacteria	Rhizobiales	Rhizobiaceae	Ensifer	?	121	772	539	554	705	409	595.8	4.92397
Sect_A_3_Glycerol	Bacteria	Actinobacteria	Actinobacteria_(class)	Corynebacteriales	Mycobacteriaceae	Mycobacterium	?	2	12	0	2	7	34	11	5.5
Sect_A_3_Glycerol	Bacteria	Proteobacteria	Betaproteobacteria	Burkholderiales	?	?	?	21	136	177	145	93	107	131.6	6.26667
Sect_A_3_Glycerol	?	?	?	?	?	?	?	93	714	683	481	433	741	610.4	6.56344
Sect_A_3_Glycerol	Bacteria	Proteobacteria	Alphaproteobacteria	Sphingomonadales	Sphingomonadaceae	Sphingopyxis	?	1	9	28	2	12	2	10.6	10.6
Sect_A_3_Glycerol	Bacteria	Proteobacteria	Betaproteobacteria	Burkholderiales	Burkholderiaceae	Cupriavidus	?	1	13	20	18	7	1	11.8	11.8
Sect_A_3_Glycerol	Bacteria	Actinobacteria	Actinobacteria_(class)	Streptomycetales	Streptomycetaceae	Streptomyces	?	40	814	489	489	569	1084	689	17.225
Sect_A_3_Lyophilization	Bacteria	Bacteroidetes	Flavobacteriia	Flavobacteriales	Crocinitomicaceae	Fluviicola	?	335	0	0	0	0		0	0
Sect_A_3_Lyophilization	Bacteria	Proteobacteria	Alphaproteobacteria	Rhodospirillales	Rhodospirillaceae	Inquilinus	?	153	1	2	0	2		1.25	0.00816993
Sect_A_3_Lyophilization	Bacteria	Bacteroidetes	Chitinophagia	Chitinophagales	Chitinophagaceae	Niastella	?	319	20	0	1	13		8.5	0.0266458
Sect_A_3_Lyophilization	Bacteria	Bacteroidetes	Chitinophagia	Chitinophagales	Chitinophagaceae	Taibaiella	?	13	0	2	0	0		0.5	0.0384615
Sect_A_3_Lyophilization	Bacteria	Bacteroidetes	Cytophagia	Cytophagales	Cytophagaceae	Dyadobacter	?	1022	28	88	157	146		104.75	0.102495
Sect_A_3_Lyophilization	Bacteria	Proteobacteria	Alphaproteobacteria	Rhodospirillales	Acetobacteraceae	Roseomonas	?	11	3	2	0	0		1.25	0.113636
Sect_A_3_Lyophilization	Bacteria	Armatimonadetes	Fimbriimonadia	Fimbriimonadales	Fimbriimonadaceae	?	?	105	20	25	1	6		13	0.12381
Sect_A_3_Lyophilization	Bacteria	Proteobacteria	Alphaproteobacteria	Rhizobiales	Rhizobiaceae	Ensifer	?	121	18	30	25	53		31.5	0.260331
Sect_A_3_Lyophilization	Bacteria	Actinobacteria	Actinobacteria_(class)	Streptomycetales	Streptomycetaceae	Streptomyces	?	40	37	21	24	41		30.75	0.76875
Sect_A_3_Lyophilization	Bacteria	Bacteroidetes	Flavobacteriia	Flavobacteriales	Flavobacteriaceae	Flavobacterium	?	537	542	476	355	322		423.75	0.789106
Sect_A_3_Lyophilization	Bacteria	Proteobacteria	Alphaproteobacteria	Rhizobiales	Phyllobacteriaceae	?	?	5	5	4	4	4		4.25	0.85
Sect_A_3_Lyophilization	Bacteria	Proteobacteria	Alphaproteobacteria	Caulobacterales	Caulobacteraceae	Caulobacter	?	57	21	39	77	73		52.5	0.921053
Sect_A_3_Lyophilization	Bacteria	Proteobacteria	Alphaproteobacteria	Rhizobiales	Hyphomicrobiaceae	?	?	659	792	882	516	406		649	0.984825
Sect_A_3_Lyophilization	Bacteria	Deinococcus-Thermus	Deinococci	Deinococcales	Deinococcaceae	Deinococcus	?	256	681	350	340	496		466.75	1.82324
Sect_A_3_Lyophilization	Bacteria	Proteobacteria	Betaproteobacteria	Burkholderiales	Comamonadaceae	Variovorax	?	1360	2170	2295	3165	2801		2607.75	1.91746
Sect_A_3_Lyophilization	Bacteria	Proteobacteria	Alphaproteobacteria	Rhizobiales	Bradyrhizobiaceae	Bosea	?	113	268	256	172	341		259.25	2.29425
Sect_A_3_Lyophilization	?	?	?	?	?	?	?	93	427	617	81	325		362.5	3.89785
Sect_A_3_Lyophilization	Bacteria	Proteobacteria	Alphaproteobacteria	Rhizobiales	Hyphomicrobiaceae	Devosia	?	9	61	48	11	27		36.75	4.08333
Sect_A_3_Lyophilization	Bacteria	Proteobacteria	Betaproteobacteria	Burkholderiales	?	?	?	21	130	76	233	132		142.75	6.79762
Sect_A_3_Lyophilization	Bacteria	Proteobacteria	Alphaproteobacteria	Sphingomonadales	Sphingomonadaceae	Sphingopyxis	?	1	2	8	39	22		17.75	17.75
Sect_A_3_Lyophilization	Bacteria	Proteobacteria	Betaproteobacteria	Burkholderiales	Burkholderiaceae	Cupriavidus	?	1	30	27	45	32		33.5	33.5
Sect_B_3_Glycerol	Bacteria	Verrucomicrobia	Verrucomicrobiae	Verrucomicrobiales	Verrucomicrobiaceae	Haloferula	?	42	0	0	0	0	0	0	0
Sect_B_3_Glycerol	Bacteria	Bacteroidetes	Flavobacteriia	Flavobacteriales	Flavobacteriaceae	Flavobacterium	?	538	4	1	1	12	12	6	0.0111524
Sect_B_3_Glycerol	Bacteria	Deinococcus-Thermus	Deinococci	Deinococcales	Deinococcaceae	Deinococcus	?	778	6	16	3	4	20	9.8	0.0125964
Sect_B_3_Glycerol	Bacteria	Proteobacteria	Alphaproteobacteria	Rhizobiales	Hyphomicrobiaceae	Devosia	?	11	0	0	1	0	1	0.4	0.0363636
Sect_B_3_Glycerol	?	?	?	?	?	?	?	135	12	2	1	4	31	10	0.0740741
Sect_B_3_Glycerol	Bacteria	Bacteroidetes	Cytophagia	Cytophagales	Cytophagaceae	Dyadobacter	?	743	226	398	180	63	21	177.6	0.239031
Sect_B_3_Glycerol	Bacteria	Proteobacteria	Alphaproteobacteria	Rhizobiales	Bradyrhizobiaceae	Bosea	?	133	56	48	60	45	87	59.2	0.445113
Sect_B_3_Glycerol	Bacteria	Bacteroidetes	Chitinophagia	Chitinophagales	Chitinophagaceae	Niastella	?	22	15	13	9	5	21	12.6	0.572727
Sect_B_3_Glycerol	Bacteria	Proteobacteria	Alphaproteobacteria	Rhizobiales	Phyllobacteriaceae	?	?	6	0	5	4	6	9	4.8	0.8
Sect_B_3_Glycerol	Bacteria	Proteobacteria	Alphaproteobacteria	Rhodospirillales	Rhodospirillaceae	Inquilinus	?	314	393	289	357	382	457	375.6	1.19618
Sect_B_3_Glycerol	Bacteria	Proteobacteria	Betaproteobacteria	Burkholderiales	Comamonadaceae	Variovorax	?	2427	2892	3127	3132	3083	2967	3040.2	1.25266
Sect_B_3_Glycerol	Bacteria	Proteobacteria	Gammaproteobacteria	Pseudomonadales	Pseudomonadaceae	Pseudomonas	?	2	4	2	0	7	0	2.6	1.3
Sect_B_3_Glycerol	Bacteria	Proteobacteria	Alphaproteobacteria	Caulobacterales	Caulobacteraceae	Caulobacter	?	21	39	26	38	23	49	35	1.66667
Sect_B_3_Glycerol	Bacteria	Actinobacteria	Actinobacteria_(class)	Streptomycetales	Streptomycetaceae	Streptomyces	?	32	79	30	123	151	86	93.8	2.93125
Sect_B_3_Glycerol	Bacteria	Proteobacteria	Alphaproteobacteria	Rhizobiales	Rhizobiaceae	Ensifer	?	2	23	20	11	18	31	20.6	10.3
Sect_B_3_Glycerol	Bacteria	Proteobacteria	Alphaproteobacteria	Sphingomonadales	Sphingomonadaceae	Sphingopyxis	?	44	1397	1174	1192	1295	1296	1270.8	28.8818
Sect_B_3_Glycerol	Bacteria	Proteobacteria	Betaproteobacteria	Burkholderiales	?	?	?	3	76	88	125	121	144	110.8	36.9333
Sect_B_3_Lyophilization	Bacteria	Bacteroidetes	Chitinophagia	Chitinophagales	Chitinophagaceae	Niastella	?	22	0	0	0	0		0	0
Sect_B_3_Lyophilization	Bacteria	Verrucomicrobia	Verrucomicrobiae	Verrucomicrobiales	Verrucomicrobiaceae	Haloferula	?	42	0	0	0	0		0	0
Sect_B_3_Lyophilization	Bacteria	Proteobacteria	Alphaproteobacteria	Caulobacterales	Caulobacteraceae	Caulobacter	?	21	1	0	0	0		0.25	0.0119048
Sect_B_3_Lyophilization	Bacteria	Proteobacteria	Alphaproteobacteria	Rhodospirillales	Rhodospirillaceae	Inquilinus	?	314	21	11	4	18		13.5	0.0429936
Sect_B_3_Lyophilization	?	?	?	?	?	?	?	135	49	9	0	0		14.5	0.107407
Sect_B_3_Lyophilization	Bacteria	Bacteroidetes	Flavobacteriia	Flavobacteriales	Flavobacteriaceae	Flavobacterium	?	538	111	88	58	68		81.25	0.151022
Sect_B_3_Lyophilization	Bacteria	Deinococcus-Thermus	Deinococci	Deinococcales	Deinococcaceae	Deinococcus	?	778	399	148	242	160		237.25	0.304949
Sect_B_3_Lyophilization	Bacteria	Bacteroidetes	Cytophagia	Cytophagales	Cytophagaceae	Dyadobacter	?	743	219	218	306	396		284.75	0.383244
Sect_B_3_Lyophilization	Bacteria	Proteobacteria	Alphaproteobacteria	Rhizobiales	Rhizobiaceae	Ensifer	?	2	0	4	2	5		2.75	1.375
Sect_B_3_Lyophilization	Bacteria	Proteobacteria	Alphaproteobacteria	Rhizobiales	Phyllobacteriaceae	?	?	6	8	7	9	13		9.25	1.54167
Sect_B_3_Lyophilization	Bacteria	Proteobacteria	Betaproteobacteria	Burkholderiales	Comamonadaceae	Variovorax	?	2427	3856	4262	3917	3348		3845.75	1.58457
Sect_B_3_Lyophilization	Bacteria	Actinobacteria	Actinobacteria_(class)	Streptomycetales	Streptomycetaceae	Streptomyces	?	32	11	12	59	136		54.5	1.70312
Sect_B_3_Lyophilization	Bacteria	Proteobacteria	Alphaproteobacteria	Rhizobiales	Bradyrhizobiaceae	Bosea	?	133	196	185	352	607		335	2.5188
Sect_B_3_Lyophilization	Bacteria	Proteobacteria	Alphaproteobacteria	Rhizobiales	Hyphomicrobiaceae	Devosia	?	11	40	62	37	32		42.75	3.88636
Sect_B_3_Lyophilization	Bacteria	Proteobacteria	Alphaproteobacteria	Sphingomonadales	Sphingomonadaceae	Sphingopyxis	?	44	176	133	226	273		202	4.59091
Sect_B_3_Lyophilization	Bacteria	Proteobacteria	Betaproteobacteria	Burkholderiales	?	?	?	3	127	87	35	167		104	34.6667
Sect_C_4_Glycerol	Bacteria	Proteobacteria	Alphaproteobacteria	Rhizobiales	Phyllobacteriaceae	?	?	260	14	12	39	43	30	27.6	0.106154
Sect_C_4_Glycerol	Bacteria	Proteobacteria	Alphaproteobacteria	Rhodospirillales	Rhodospirillaceae	Inquilinus	?	181	11	27	29	30	20	23.4	0.129282
Sect_C_4_Glycerol	Bacteria	Proteobacteria	Betaproteobacteria	Burkholderiales	Comamonadaceae	Variovorax	?	186	22	153	33	23	20	50.2	0.269892
Sect_C_4_Glycerol	Bacteria	Proteobacteria	Alphaproteobacteria	Rhizobiales	Bradyrhizobiaceae	Bosea	?	253	41	112	54	76	72	71	0.280632
Sect_C_4_Glycerol	Bacteria	Actinobacteria	Actinobacteria_(class)	Corynebacteriales	Nocardiaceae	Rhodococcus	?	1824	651	366	964	596	547	624.8	0.342544
Sect_C_4_Glycerol	Bacteria	Actinobacteria	Actinobacteria_(class)	Corynebacteriales	Mycobacteriaceae	Mycobacterium	?	6	3	0	4	3	2	2.4	0.4
Sect_C_4_Glycerol	Bacteria	Proteobacteria	Betaproteobacteria	Burkholderiales	Oxalobacteraceae	Massilia	?	16	4	4	9	13	19	9.8	0.6125
Sect_C_4_Glycerol	Bacteria	Proteobacteria	Alphaproteobacteria	Rhizobiales	Rhizobiaceae	Ensifer	?	188	78	149	110	114	135	117.2	0.623404
Sect_C_4_Glycerol	Bacteria	Actinobacteria	Actinobacteria_(class)	Streptomycetales	Streptomycetaceae	Streptomyces	?	248	299	103	231	115	100	169.6	0.683871
Sect_C_4_Glycerol	Bacteria	Bacteroidetes	Cytophagia	Cytophagales	Cytophagaceae	Dyadobacter	?	537	368	750	558	749	630	611	1.1378
Sect_C_4_Glycerol	Bacteria	Proteobacteria	Alphaproteobacteria	Rhizobiales	Xanthobacteraceae	?	?	55	70	34	75	70	81	66	1.2
Sect_C_4_Glycerol	?	?	?	?	?	?	?	366	1030	463	329	305	223	470	1.28415
Sect_C_4_Glycerol	Bacteria	Proteobacteria	Alphaproteobacteria	Sphingomonadales	Sphingomonadaceae	Sphingopyxis	?	354	201	696	574	627	791	577.8	1.6322
Sect_C_4_Glycerol	Bacteria	Proteobacteria	Alphaproteobacteria	Caulobacterales	Caulobacteraceae	Phenylobacterium	?	2	5	0	7	4	3	3.8	1.9
Sect_C_4_Glycerol	Bacteria	Bacteroidetes	Chitinophagia	Chitinophagales	Chitinophagaceae	Taibaiella	?	495	1169	982	1010	992	1047	1040	2.10101
Sect_C_4_Glycerol	Bacteria	Proteobacteria	Alphaproteobacteria	Rhizobiales	?	?	?	3	10	3	6	6	13	7.6	2.53333
Sect_C_4_Glycerol	Bacteria	Proteobacteria	Alphaproteobacteria	Rhizobiales	Rhizobiaceae	Rhizobium	?	4	8	34	12	11	13	15.6	3.9
Sect_C_4_Glycerol	Bacteria	Proteobacteria	Alphaproteobacteria	Caulobacterales	Caulobacteraceae	Caulobacter	?	7	32	22	28	37	52	34.2	4.88571
Sect_C_4_Glycerol	Bacteria	Proteobacteria	Alphaproteobacteria	Rhizobiales	Rhizobiaceae	Ensifer	?	247	1103	1214	1107	1379	1378	1236.2	5.00486
Sect_C_4_Glycerol	Bacteria	Proteobacteria	Betaproteobacteria	Burkholderiales	Comamonadaceae	?	?	10	124	38	61	55	65	68.6	6.86
Sect_C_4_Glycerol	Bacteria	Proteobacteria	Gammaproteobacteria	Pseudomonadales	Pseudomonadaceae	Pseudomonas	?	2	6	64	9	2	0	16.2	8.1
Sect_C_4_Lyophilization	Bacteria	Proteobacteria	Alphaproteobacteria	Rhodospirillales	Rhodospirillaceae	Inquilinus	?	181	0	0	0	0		0	0
Sect_C_4_Lyophilization	Bacteria	Proteobacteria	Betaproteobacteria	Burkholderiales	Oxalobacteraceae	Massilia	?	16	1	1	0	0		0.5	0.03125
Sect_C_4_Lyophilization	Bacteria	Proteobacteria	Alphaproteobacteria	Rhizobiales	Phyllobacteriaceae	?	?	260	57	48	34	37		44	0.169231
Sect_C_4_Lyophilization	Bacteria	Proteobacteria	Alphaproteobacteria	Caulobacterales	Caulobacteraceae	Caulobacter	?	7	2	2	0	2		1.5	0.214286
Sect_C_4_Lyophilization	Bacteria	Actinobacteria	Actinobacteria_(class)	Streptomycetales	Streptomycetaceae	Streptomyces	?	248	60	38	108	58		66	0.266129
Sect_C_4_Lyophilization	?	?	?	?	?	?	?	366	63	143	147	57		102.5	0.280055
Sect_C_4_Lyophilization	Bacteria	Proteobacteria	Alphaproteobacteria	Rhizobiales	Xanthobacteraceae	?	?	55	20	21	21	17		19.75	0.359091
Sect_C_4_Lyophilization	Bacteria	Proteobacteria	Alphaproteobacteria	Rhizobiales	Rhizobiaceae	Ensifer	?	247	119	85	87	74		91.25	0.369433
Sect_C_4_Lyophilization	Bacteria	Actinobacteria	Actinobacteria_(class)	Corynebacteriales	Mycobacteriaceae	Mycobacterium	?	6	2	1	6	1		2.5	0.416667
Sect_C_4_Lyophilization	Bacteria	Bacteroidetes	Chitinophagia	Chitinophagales	Chitinophagaceae	Taibaiella	?	495	177	531	93	358		289.75	0.585354
Sect_C_4_Lyophilization	Bacteria	Actinobacteria	Actinobacteria_(class)	Corynebacteriales	Nocardiaceae	Rhodococcus	?	1824	1217	1703	1979	1437		1584	0.868421
Sect_C_4_Lyophilization	Bacteria	Proteobacteria	Alphaproteobacteria	Rhizobiales	Bradyrhizobiaceae	Bosea	?	253	332	235	466	289		330.5	1.30632
Sect_C_4_Lyophilization	Bacteria	Proteobacteria	Alphaproteobacteria	Rhizobiales	Rhizobiaceae	Rhizobium	?	4	4	10	2	5		5.25	1.3125
Sect_C_4_Lyophilization	Bacteria	Bacteroidetes	Cytophagia	Cytophagales	Cytophagaceae	Dyadobacter	?	537	693	794	856	701		761	1.41713
Sect_C_4_Lyophilization	Bacteria	Proteobacteria	Alphaproteobacteria	Sphingomonadales	Sphingomonadaceae	Sphingopyxis	?	354	718	670	524	855		691.75	1.9541
Sect_C_4_Lyophilization	Bacteria	Proteobacteria	Betaproteobacteria	Burkholderiales	Comamonadaceae	Variovorax	?	186	591	407	296	711		501.25	2.69489
Sect_C_4_Lyophilization	Bacteria	Proteobacteria	Alphaproteobacteria	Rhizobiales	Rhizobiaceae	Ensifer	?	188	1102	518	600	566		696.5	3.70479
Sect_C_4_Lyophilization	Bacteria	Proteobacteria	Betaproteobacteria	Burkholderiales	Comamonadaceae	?	?	10	97	43	24	81		61.25	6.125
Sect_F_3_Glycerol	Bacteria	Proteobacteria	Alphaproteobacteria	Rhodospirillales	Rhodospirillaceae	Inquilinus	?	11	1	0	0	2	2	1	0.0909091
Sect_F_3_Glycerol	Bacteria	Proteobacteria	Alphaproteobacteria	Rhodospirillales	Rhodospirillaceae	Inquilinus	?	596	78	47	39	46	64	54.8	0.0919463
Sect_F_3_Glycerol	Bacteria	Bacteroidetes	Chitinophagia	Chitinophagales	Chitinophagaceae	Taibaiella	?	505	88	98	113	98	99	99.2	0.196436
Sect_F_3_Glycerol	Bacteria	Proteobacteria	Betaproteobacteria	Burkholderiales	Comamonadaceae	Variovorax	?	120	40	23	23	23	17	25.2	0.21
Sect_F_3_Glycerol	Bacteria	Proteobacteria	Alphaproteobacteria	Rhizobiales	Rhizobiaceae	Ensifer	?	32	14	6	9	6	7	8.4	0.2625
Sect_F_3_Glycerol	Bacteria	Proteobacteria	Alphaproteobacteria	Rhizobiales	Bradyrhizobiaceae	Bosea	?	98	35	22	23	25	32	27.4	0.279592
Sect_F_3_Glycerol	Bacteria	Bacteroidetes	Chitinophagia	Chitinophagales	Chitinophagaceae	?	?	491	75	192	122	128	178	139	0.283096
Sect_F_3_Glycerol	Bacteria	Proteobacteria	Alphaproteobacteria	Sphingomonadales	Sphingomonadaceae	Sphingomonas	?	11	6	6	4	1	1	3.6	0.327273
Sect_F_3_Glycerol	Bacteria	Proteobacteria	Alphaproteobacteria	Rhodospirillales	Rhodospirillaceae	Azospirillum	?	179	118	84	85	78	91	91.2	0.509497
Sect_F_3_Glycerol	?	?	?	?	?	?	?	357	96	239	243	155	177	182	0.509804
Sect_F_3_Glycerol	Bacteria	Proteobacteria	Alphaproteobacteria	Caulobacterales	Caulobacteraceae	Caulobacter	?	1073	546	361	673	648	534	552.4	0.514818
Sect_F_3_Glycerol	Bacteria	Proteobacteria	Gammaproteobacteria	Legionellales	?	?	?	169	42	112	94	77	129	90.8	0.537278
Sect_F_3_Glycerol	Bacteria	Proteobacteria	Alphaproteobacteria	Rhizobiales	Rhizobiaceae	Rhizobium	?	198	94	67	155	148	90	110.8	0.559596
Sect_F_3_Glycerol	Bacteria	Proteobacteria	Alphaproteobacteria	Rhizobiales	Hyphomicrobiaceae	?	?	5	1	3	3	4	9	4	0.8
Sect_F_3_Glycerol	Bacteria	Bacteroidetes	Cytophagia	Cytophagales	Cytophagaceae	Dyadobacter	?	316	187	200	330	390	374	296.2	0.937342
Sect_F_3_Glycerol	Bacteria	Proteobacteria	Betaproteobacteria	Burkholderiales	?	?	?	100	168	76	154	161	98	131.4	1.314
Sect_F_3_Glycerol	Bacteria	Proteobacteria	Alphaproteobacteria	Sphingomonadales	Sphingomonadaceae	Sphingopyxis	?	83	200	78	161	158	151	149.6	1.80241
Sect_F_3_Glycerol	Bacteria	Proteobacteria	Alphaproteobacteria	Rhizobiales	Rhizobiaceae	Ensifer	?	564	1946	708	1238	1092	752	1147.2	2.03404
Sect_F_3_Glycerol	Bacteria	Proteobacteria	Alphaproteobacteria	Rhizobiales	Rhizobiaceae	Ensifer	?	1	3	0	1	7	0	2.2	2.2
Sect_F_3_Glycerol	Bacteria	Actinobacteria	Actinobacteria_(class)	Streptomycetales	Streptomycetaceae	Streptomyces	?	336	1500	2927	1773	1985	2447	2126.4	6.32857
Sect_F_3_Glycerol	Bacteria	Proteobacteria	Alphaproteobacteria	Rhizobiales	?	?	?	1	8	6	5	13	2	6.8	6.8
Sect_F_3_Lyophilization	Bacteria	Proteobacteria	Alphaproteobacteria	Rhodospirillales	Rhodospirillaceae	Inquilinus	?	11	0	0	0	0		0	0
Sect_F_3_Lyophilization	Bacteria	Proteobacteria	Alphaproteobacteria	Rhodospirillales	Rhodospirillaceae	Inquilinus	?	596	1	0	1	0		0.5	0.000838926
Sect_F_3_Lyophilization	Bacteria	Proteobacteria	Alphaproteobacteria	Rhodospirillales	Rhodospirillaceae	Azospirillum	?	179	0	0	1	0		0.25	0.00139665
Sect_F_3_Lyophilization	Bacteria	Bacteroidetes	Chitinophagia	Chitinophagales	Chitinophagaceae	?	?	491	10	4	13	11		9.5	0.0193483
Sect_F_3_Lyophilization	Bacteria	Proteobacteria	Gammaproteobacteria	Legionellales	?	?	?	169	0	13	15	0		7	0.0414201
Sect_F_3_Lyophilization	Bacteria	Bacteroidetes	Chitinophagia	Chitinophagales	Chitinophagaceae	Taibaiella	?	505	47	26	44	26		35.75	0.0707921
Sect_F_3_Lyophilization	Bacteria	Proteobacteria	Alphaproteobacteria	Caulobacterales	Caulobacteraceae	Caulobacter	?	1073	128	122	148	64		115.5	0.107642
Sect_F_3_Lyophilization	?	?	?	?	?	?	?	357	0	122	99	7		57	0.159664
Sect_F_3_Lyophilization	Bacteria	Actinobacteria	Actinobacteria_(class)	Streptomycetales	Streptomycetaceae	Streptomyces	?	336	41	148	66	95		87.5	0.260417
Sect_F_3_Lyophilization	Bacteria	Proteobacteria	Alphaproteobacteria	Rhizobiales	Hyphomicrobiaceae	?	?	5	4	0	2	2		2	0.4
Sect_F_3_Lyophilization	Bacteria	Proteobacteria	Alphaproteobacteria	Rhizobiales	Bradyrhizobiaceae	Bosea	?	98	65	87	84	74		77.5	0.790816
Sect_F_3_Lyophilization	Bacteria	Proteobacteria	Alphaproteobacteria	Rhizobiales	Rhizobiaceae	Ensifer	?	564	491	732	724	684		657.75	1.16622
Sect_F_3_Lyophilization	Bacteria	Proteobacteria	Gammaproteobacteria	Pseudomonadales	Pseudomonadaceae	Pseudomonas	?	5	0	0	25	2		6.75	1.35
Sect_F_3_Lyophilization	Bacteria	Bacteroidetes	Cytophagia	Cytophagales	Cytophagaceae	Dyadobacter	?	316	620	386	567	648		555.25	1.75712
Sect_F_3_Lyophilization	Bacteria	Proteobacteria	Alphaproteobacteria	Rhizobiales	Rhizobiaceae	Ensifer	?	32	64	54	65	81		66	2.0625
Sect_F_3_Lyophilization	Bacteria	Bacteroidetes	Sphingobacteriia	Sphingobacteriales	Sphingobacteriaceae	Pedobacter	?	1	0	0	12	0		3	3
Sect_F_3_Lyophilization	Bacteria	Proteobacteria	Alphaproteobacteria	Sphingomonadales	Sphingomonadaceae	Sphingomonas	?	11	26	45	35	34		35	3.18182
Sect_F_3_Lyophilization	Bacteria	Proteobacteria	Alphaproteobacteria	Rhizobiales	Rhizobiaceae	Rhizobium	?	198	881	876	952	1006		928.75	4.69066
Sect_F_3_Lyophilization	Bacteria	Proteobacteria	Betaproteobacteria	Burkholderiales	Comamonadaceae	Variovorax	?	120	904	633	613	740		722.5	6.02083
Sect_F_3_Lyophilization	Bacteria	Proteobacteria	Alphaproteobacteria	Rhizobiales	Rhizobiaceae	Ensifer	?	1	7	7	8	7		7.25	7.25
Sect_F_3_Lyophilization	Bacteria	Proteobacteria	Betaproteobacteria	Burkholderiales	?	?	?	100	862	740	711	809		780.5	7.805
Sect_F_3_Lyophilization	Bacteria	Proteobacteria	Alphaproteobacteria	Sphingomonadales	Sphingomonadaceae	Sphingopyxis	?	83	1076	1224	910	918		1032	12.4337
Sect_F_3_Lyophilization	Bacteria	Proteobacteria	Alphaproteobacteria	Rhizobiales	?	?	?	1	13	14	22	16		16.25	16.25
