# Supplementary material for: Development and Analysis of a Stable, Reduced Complexity Model Soil Microbiome
Source: Front Microbiol. 2020 Aug 26;11:1987. doi: 10.3389/fmicb.2020.01987 (PMC7479069; doi:10.3389/fmicb.2020.01987)
Supplement: Supplementary file 3 [file Table_3.XLSX]

## Sheet: Sheet1
OTU_ID	C2_RepA	C2_RepB	C2_RepC	taxonomy
OTU1	299	300	204	k__Fungi
OTU2	25	25	103	k__Fungi;p__Ascomycota;c__Dothideomycetes;o__Capnodiales;f__Mycosphaerellaceae
